# Supplementary material
Source: publisher figshare collection journal article supplement (https://acs.figshare.com/ndownloader/files/5961687)
Supplement: Supplementary file 1 [file 5961687]

## Supporting Information

### Proton conduction in sulfonated organic-inorganic hybrid monoliths with hierarchical pore structure

*Martin von der Lehr,<sup>§</sup> Christopher F. Seidler,<sup>†</sup> Dereje H. Taffa,<sup>†</sup>  
Michael Wark,<sup>†</sup> Bernd M. Smarsly,<sup>§</sup> Roland Marschall<sup>§\*</sup>*

*<sup>§</sup>Institute of Physical Chemistry, Justus-Liebig-University Giessen, 35392 Giessen, Germany*

*<sup>†</sup>Institute of Chemistry, Carl von Ossietzky University Oldenburg, 26129 Oldenburg, Germany.*

\*Email: [Roland.marschall@phys.chemie.uni-giessen.de](mailto:Roland.marschall@phys.chemie.uni-giessen.de)

## Results

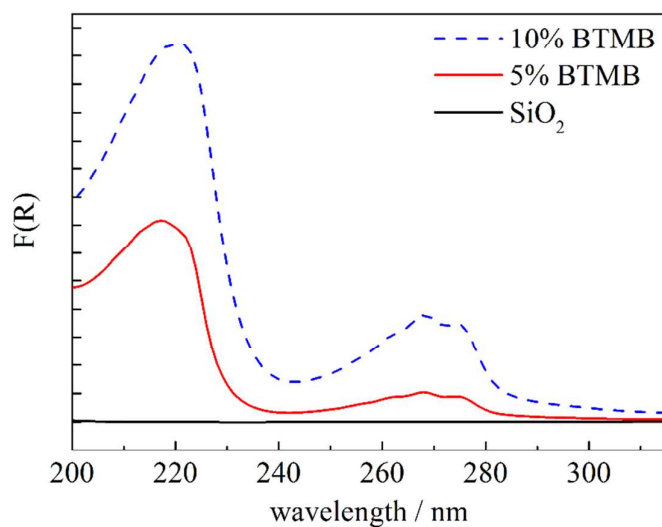

**Figure S1.** Absorption measurements of pure  $\text{SiO}_2$  compared to unsulfonated hybrid monoliths containing 5 or 10% BTMB.

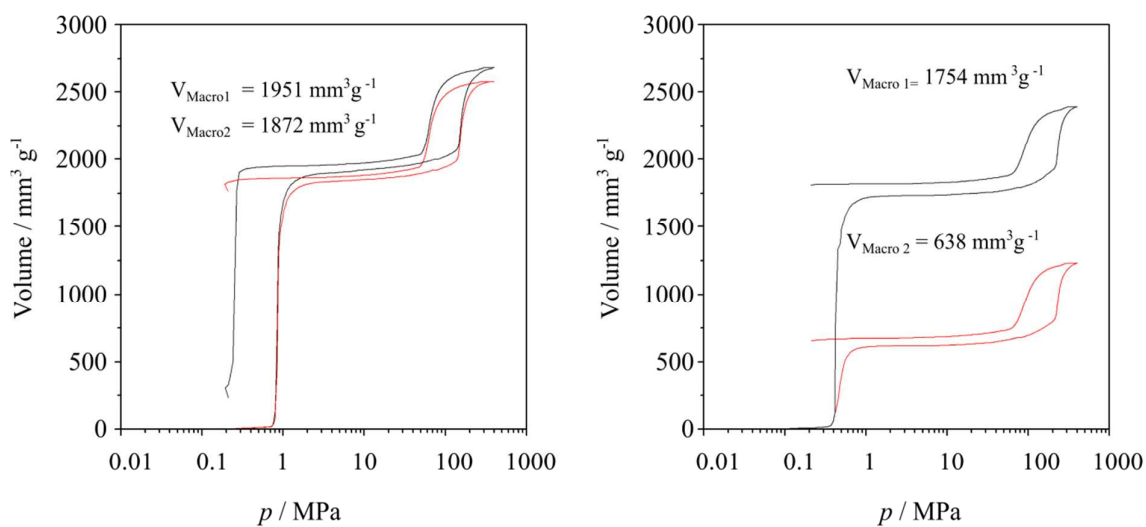

**Figure S2.** Mercury intrusion/extrusion curves of two consecutive cycle runs (1<sup>st</sup> run: black line, 2<sup>nd</sup> run: red line) of the samples HTT 368/27 containing 5% BTMB (left) and 10% BTMB (right), respectively

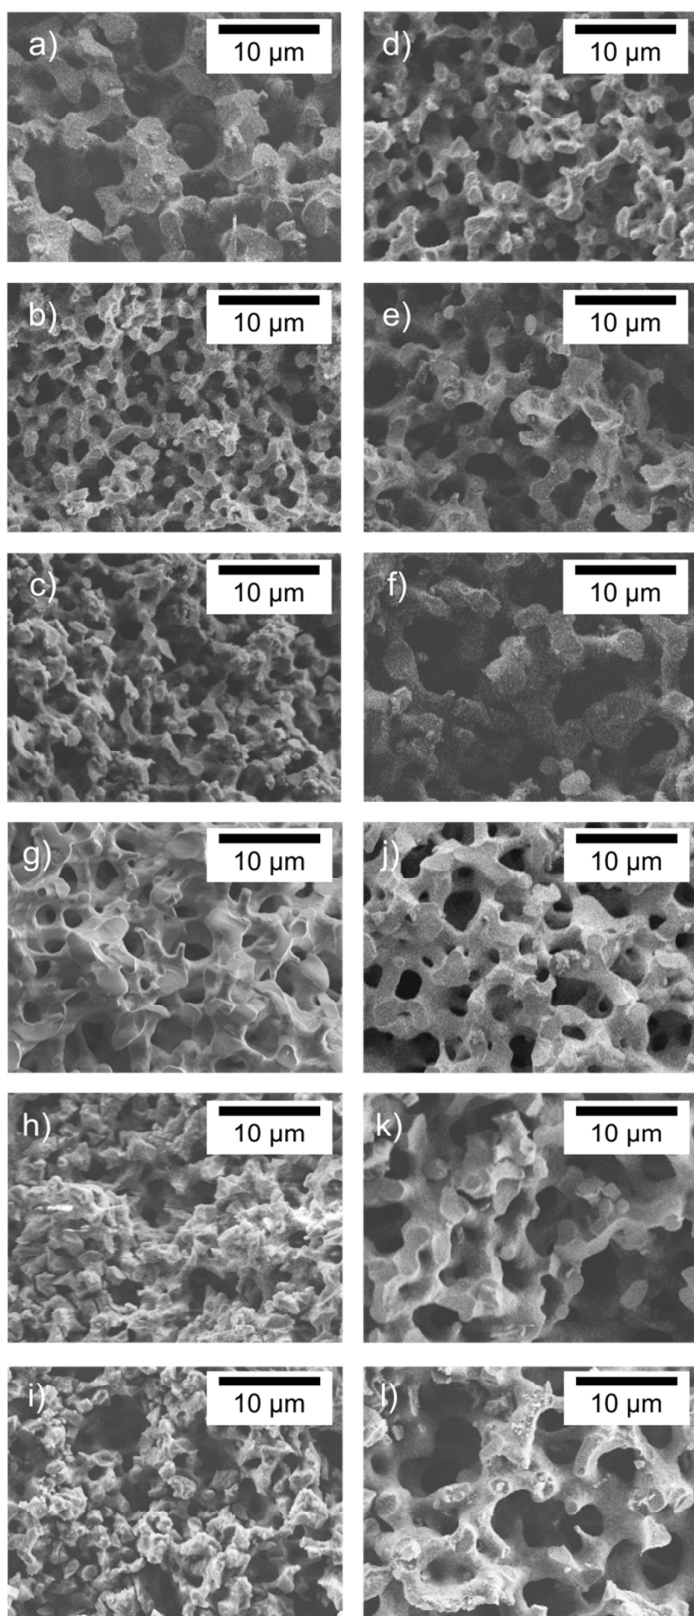

**Figure S3.** SEM images of solvothermally treated samples before sulfonation, a) 5% BTMB HTT 353/15, b) 5% BTMB HTT 353/27, c) 5% BTMB HTT 368/27, d) 10% BTMB HTT 353/15, e) 10% BTMB HTT 353/27, f) 10% BTMB HTT 368/27 and after sulfonation g) 5% BTMB HTT 353/15, h) 5% BTMB HTT 353/27, i) 5% BTMB HTT 368/27, j) 10% BTMB HTT 353/15, k) 10% BTMB HTT 353/27, l) 10% BTMB HTT 368/27.

5% BTMB HTT 353/27, i) 5% BTMB HTT 368/27, j) 10% BTMB HTT 353/15, k) 10% BTMB HTT 353/27, l) 10% BTMB HTT 368/27.

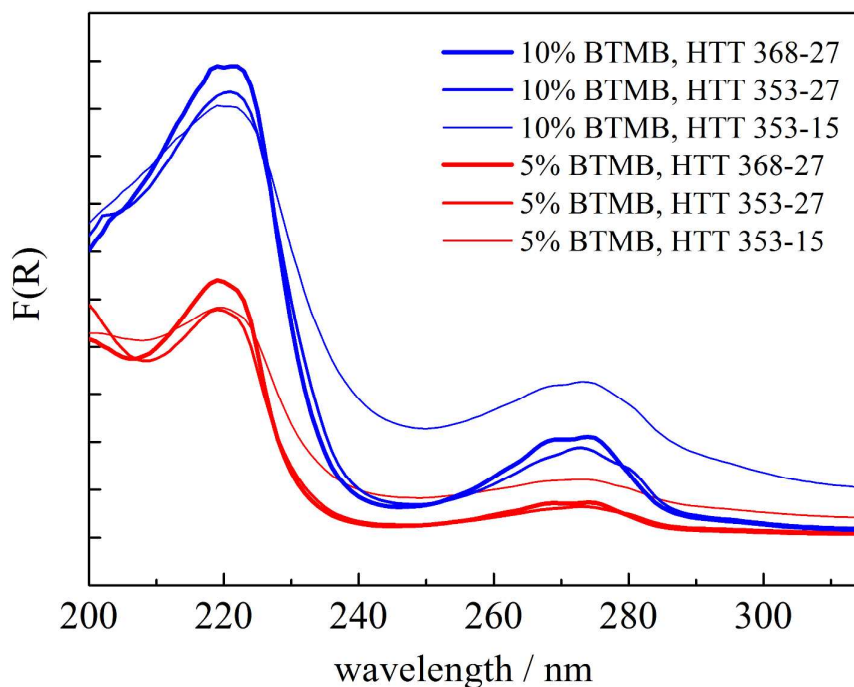

**Figure S4.** Absorption spectra of sulfonated hybrid monoliths.

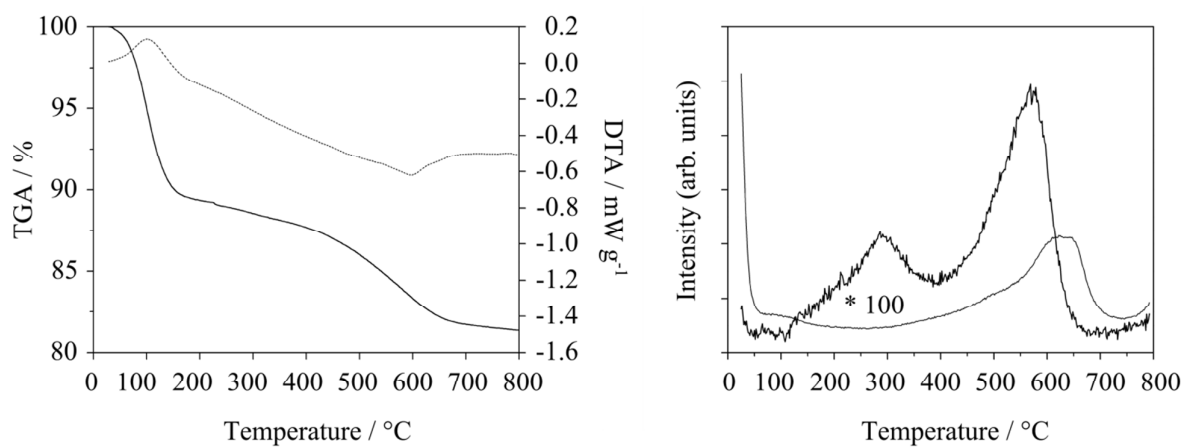

**Figure S5.** Left: TGA and DTA (dashed line) of monolithic hybrid (HTT 353/15) containing 5% BTMB; Right: according TG-MS traces with detected  $m/z = 44$  ( $\text{CO}_2$ ) and  $m/z = 64$  ( $\text{SO}_2$ ) as annealing products from the decomposition of the sulfonated aromatic moiety.

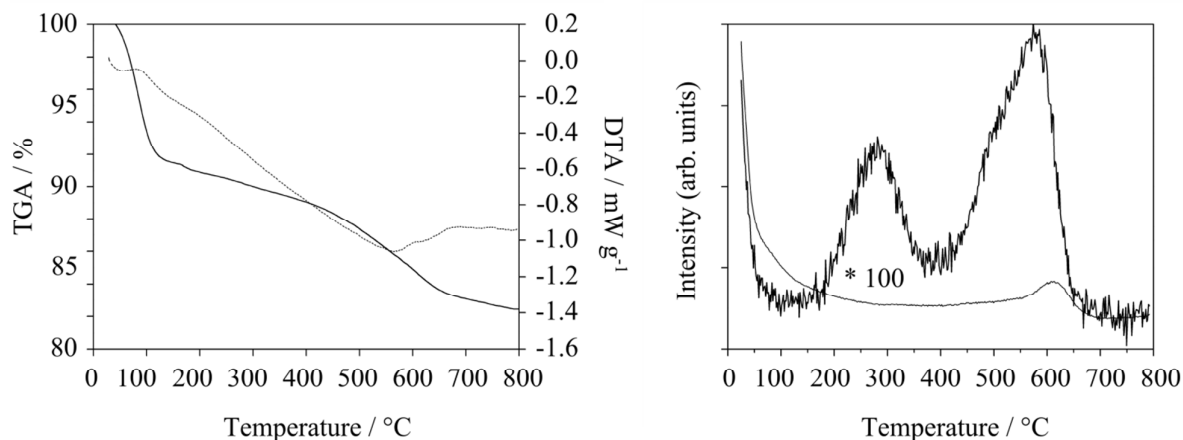

**Figure S6.** Left: TGA and DTA (dashed line) of monolithic hybrid (HTT 353/27) containing 5% BTMB; Right: according TG-MS traces with detected  $m/z = 44$  (CO<sub>2</sub>) and  $m/z = 64$  (SO<sub>2</sub>) as annealing products from the decomposition of the sulfonated aromatic moiety.

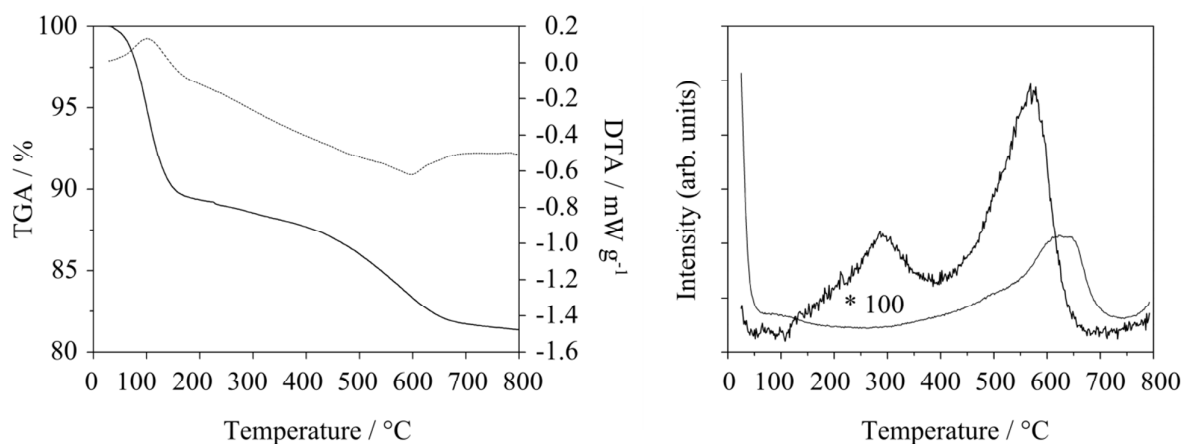

**Figure S7.** Left: TGA and DTA (dashed line) of monolithic hybrid (HTT 368/27) containing 5% BTMB; Right: according TG-MS traces with detected  $m/z = 44$  (CO<sub>2</sub>) and  $m/z = 64$  (SO<sub>2</sub>) as annealing products from the decomposition of the sulfonated aromatic moiety.

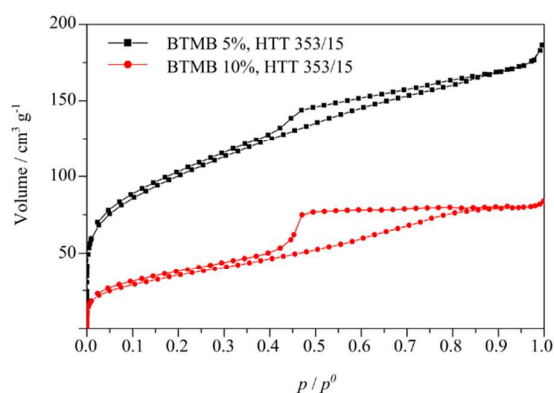

**Figure S8.** Low pressure N<sub>2</sub> physisorption isotherms from micropore analysis for hybrid monolith samples HTT 353/15 containing 5% BTMB (black symbols) and 10% BTMB (red symbols) after solvothermal treatment and sulfonation.

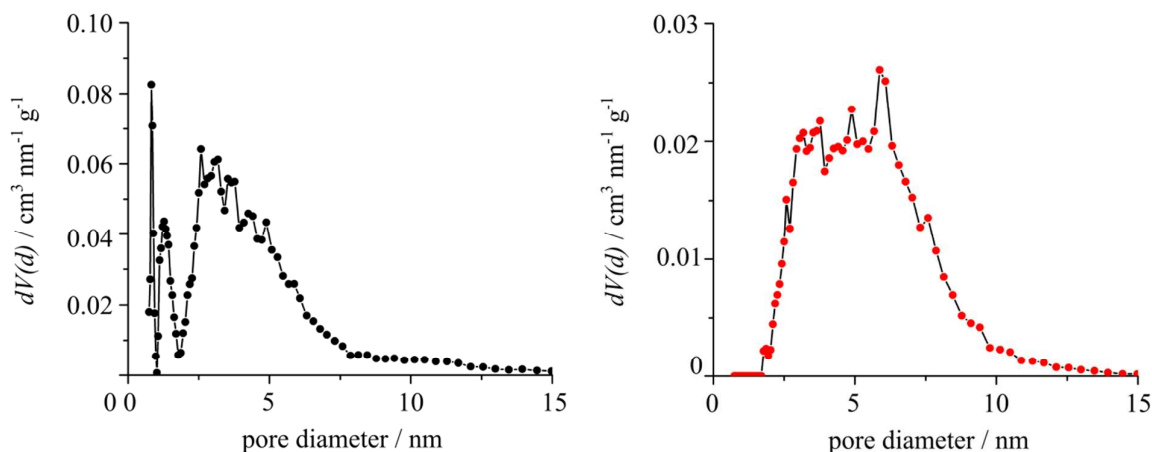

**Figure S9.** Pore size distribution from low pressure micropore analyses via NLDFT adsorption branch model for hybrid monolith samples HTT 353/15 containing 5% BTMB (left) and 10% BTMB (right) after solvothermal treatment and sulfonation.

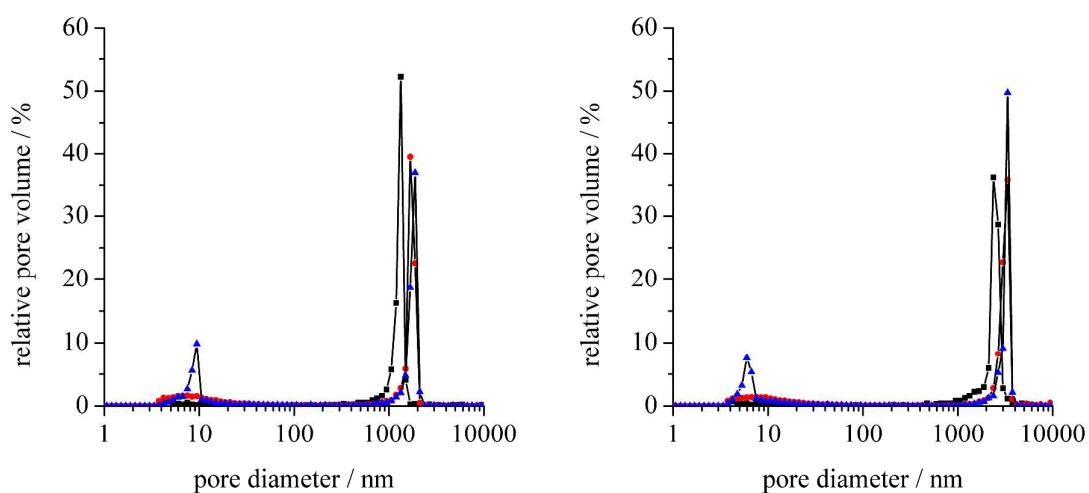

**Figure S10.** Mercury intrusion porosimetry for sulfonated meso-macroporous hybrid monoliths containing 5% BTMB (left) and 10% BTMB (right) after solvothermal treatment at (■) HTT 353/15, (●) HTT 353/27, (▲) HTT 368/27.

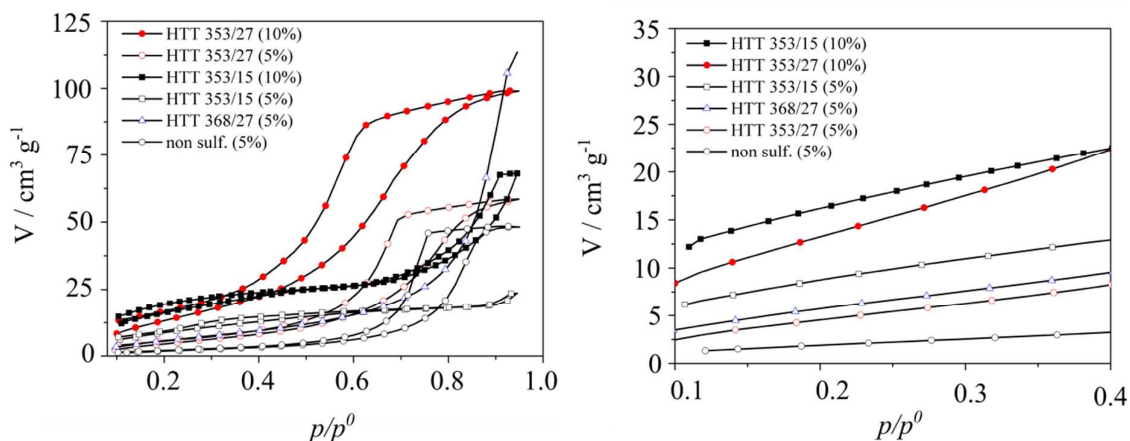

**Figure S11.** Water sorption isotherms of sulfonated and non-sulfonated monolithic hybrid materials performed at 298 K; full isotherms (left) and zoom in of adsorption branches at lower relative pressures (right).

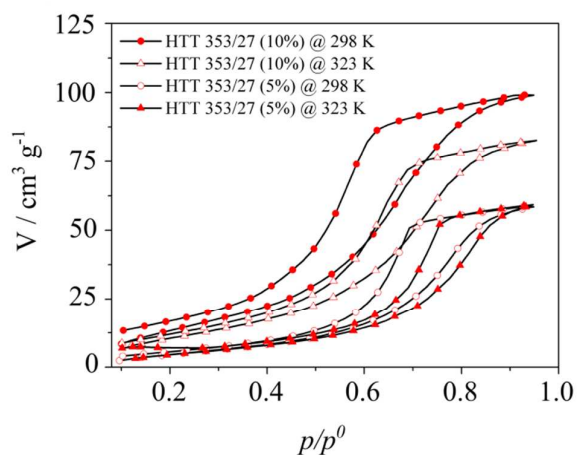

**Figure S12.** Water sorption isotherms of sulfonated monolithic hybrid materials HTT 353/27 at different temperatures.

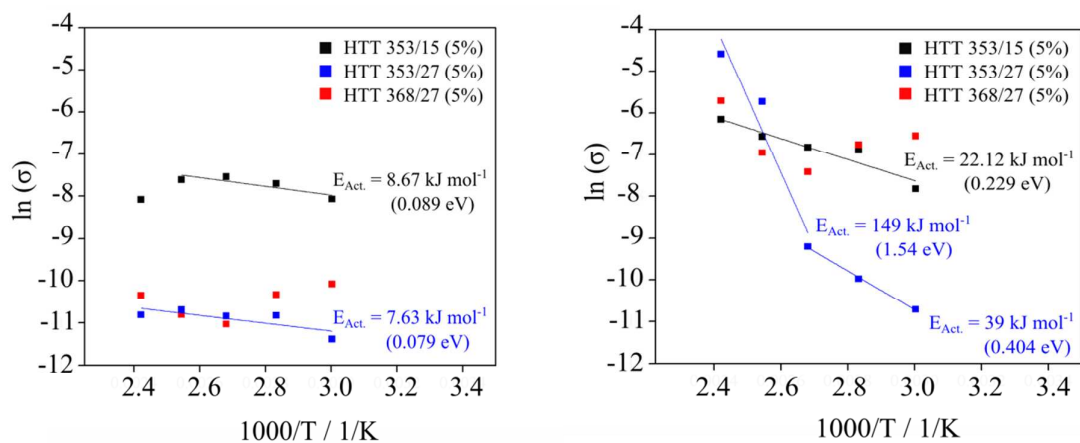

**Figure S13.** Arrhenius plots with activation energies of sulfonated hybrid monoliths containing 5% BTMB at 50% relative humidity (left) and 100% relative humidity (right).

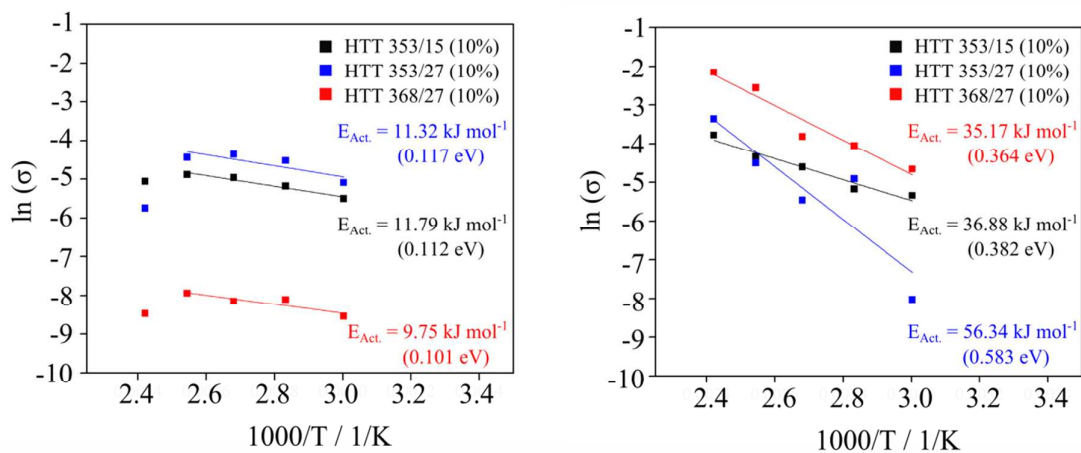

**Figure S14.** Arrhenius plots with activation energies of sulfonated hybrid monoliths containing 10% BTMB at 50% relative humidity (left) and 100% relative humidity (right).

**Table S1.** Results from CHNS elemental analyses

| Sample name                          | C (%) | H (%) | N (%) | S (%) | S (mmol g <sup>-1</sup> ) |
|--------------------------------------|-------|-------|-------|-------|---------------------------|
| TMOS/BTMB (95/5), SO <sub>3</sub> H  | 2.13  | 1.85  | 0.01  | 0.89  | 0.218                     |
| HTT 353/15                           |       |       |       |       |                           |
| TMOS/BTMB (95/5), SO <sub>3</sub> H  | 2.02  | 1.33  | 0.02  | 0.65  | 0.131                     |
| HTT 353/27                           |       |       |       |       |                           |
| TMOS/BTMB (95/5), SO <sub>3</sub> H  | 2.35  | 0.93  | 0.01  | 0.72  | 0.130                     |
| HTT 368/27                           |       |       |       |       |                           |
| TMOS/BTMB (90/10), SO <sub>3</sub> H | 3.08  | 2.09  | 0.01  | 2.07  | 0.647                     |
| HTT 353/15                           |       |       |       |       |                           |
| TMOS/BTMB (90/10), SO <sub>3</sub> H | 3.17  | 1.60  | 0.00  | 1.76  | 0.548                     |
| HTT 353/27                           |       |       |       |       |                           |
| TMOS/BTMB (90/10), SO <sub>3</sub> H | 3.97  | 1.15  | 0.01  | 1.04  | 0.324                     |
| HTT 368/27                           |       |       |       |       |                           |
